# Supplementary material
Source: Springer Nature journal article supplement (https://www.springermedizin.de/resource/supplementary/12936_2013_3028_MOESM3_ESM.pdf/9544880)
Supplement: MOESM3 [file 9544880]

**A**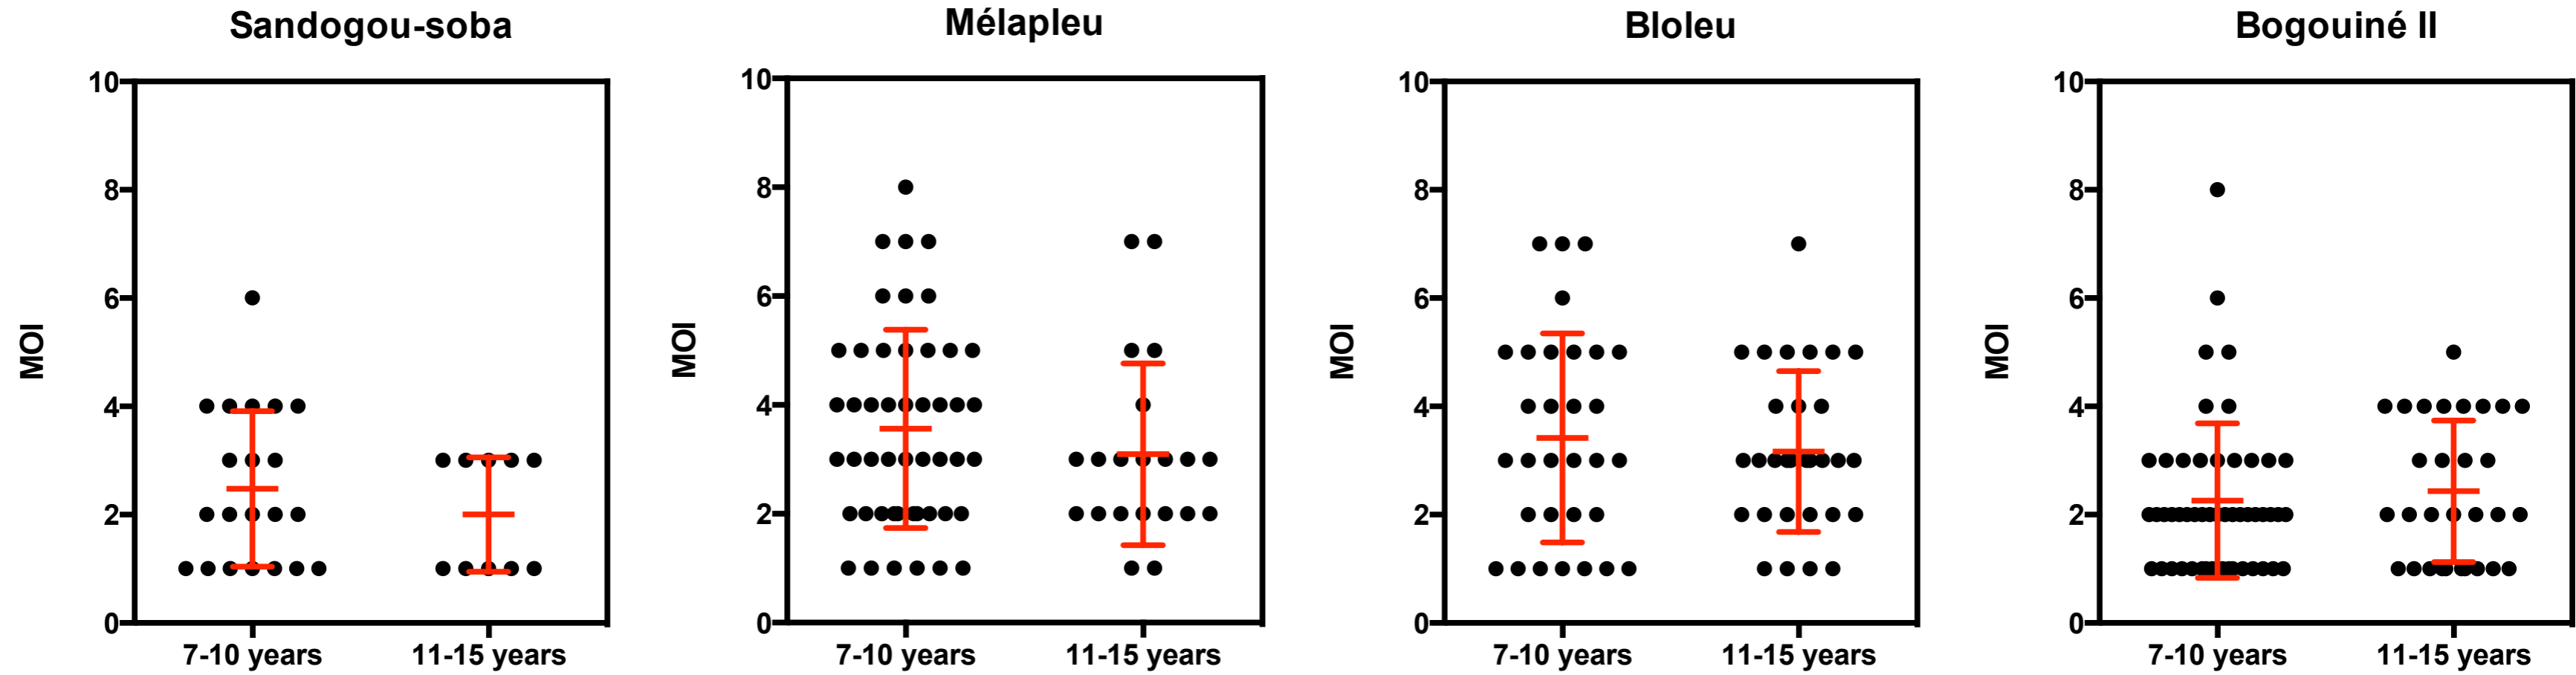**B**

|                               | Sandougou-soba | Mélapleu    | Bloleu      | Bogouiné II |
|-------------------------------|----------------|-------------|-------------|-------------|
| MOI in 7-10 years (SD)        | 2.48 (1.44)    | 3.56 (1.82) | 3.42 (1.93) | 2.26 (1.43) |
| MOI in 11-15 years (SD)       | 2.00 (1.05)    | 3.10 (1.67) | 3.17 (1.49) | 2.43 (1.31) |
| <i>p</i> value (Mann-Whitney) | 0.39           | 0.28        | 0.70        | 0.45        |
